# Supplementary material for: Diverse DNA modification in marine prokaryotic and viral communities
Source: bioRxiv or medRxiv preprint supplement (doi:10.1101/2021.05.08.442635), 2021-05-08
Supplement: Supplementary file [file media-1.pdf]

1 **SUPPLEMENTARY INFORMATION**

2

3 **Diverse DNA modification in marine prokaryotic and viral communities**

4

5

6 Satoshi Hiraoka<sup>1\*</sup>, Tomomi Sumida<sup>1</sup>, Miho Hirai<sup>2</sup>, Atsushi Toyoda<sup>3</sup>, Shinsuke Kawagucci<sup>2</sup>, Taichi  
7 Yokokawa<sup>2</sup>, and Takuro Nunoura<sup>1</sup>

8

9

10 \*Correspondence should be addressed to:

11 [hiraokas@jamstec.go.jp](mailto:hiraokas@jamstec.go.jp)

12

13

14 This PDF file includes:

15 Supplementary notes S1 to S2

16 Supplementary references

17 Supplementary figures S1 to S10.

18 Supplementary tables S1 to S4.

## Supplementary notes

### Note S1. *In vitro* assay of MTases that possess GAWTC specificity.

The REase digestion assays of MTases detected from Alphaproteobacteria P-MAGs and predicted to recognize the GAWTC motif showed notable plasmid cleavage patterns associated with incubation temperature after MTase expression (Figures S7a-d). To better understand the MTases, CM15mP111\_3240 was chosen as a representative for further *in vitro* assays as an alternative to *in vivo* methylation. The CM15mP111\_3240 gene is 367 aa long with a molecular weight of 42.6 kDa, similar to M.CcrMI (359 aa with 39.7 kDa). Initial purification efforts of the protein with N-terminal His-tag constructed using PCR and protein elution according to the previous studies of M.CcrMI (1–4); however, it resulted in mild insolubilization, possibly due to the high concentration of imidazole (300 mM). Alternative approaches including on-column tag digestion, which involves cleavage of either N- or C-terminal His-tags with human rhinovirus 3C (HRV 3C) protease cleavage site (Leu-Glu-Val-Leu-Phe-Gln-Gly-Pro) were then conducted, but SDS-PAGE analysis also showed significant insolubilization. Therefore, we used the initial approach accompanied with a five-fold dilution of aliquots with storage buffer immediately after protein elution (50 mM imidazole, final concentration) to avoid insolubilization. This strategy resulted in a significantly higher amount of purified protein with high purity, as confirmed using SDS-PAGE.

CM15mP111\_3240 MTase appeared to partially block HinfI cleavage under low salt concentrations (0–150 mM NaCl), as expected when GAWTC sites were specifically methylated (Figure S8a). In contrast, substantially no additional inhibition was observed when more than 250 mM NaCl was supplied, indicating that high salt concentrations affect enzymatic activity. The assays of thermal sensitivity showed positive enzymatic activity at 5–35 °C (especially fairly active at 15–25 °C), but not at >35 °C (Figure S8b). These profiles strongly support our hypothesis that MTase recognizes GAWTC and causes methylation. The temperature-activity profile was concordant with the marine water temperature at the sampling sites (Figure S1b), suggesting that MTase was thermally optimized in an epipelagic environment. Out of the optimal conditions, we found that HinfI cleavage was further inhibited beyond merely GAWTC methylation after MTase reaction with higher enzymatic and glycerol concentrations (Figure S8c). This indicates that abnormal conditions lead to relaxing the sequence recognition of MTase, resulting in the promiscuous extension of its specificity from GAWTC to GANTC. This phenomenon was similarly observed in the number of REases known as 'star activity', and has also been reported for various MTases (5–11). Hence, the remarkable inhibition of HinfI cleavage observed in the *in vitro* assay (Figures S7a-d) could be explained by the artificially induced overexpression of the protein lead star activity, which caused the peculiar methylation block against REase digestion. Taken together, CM15mP111\_3240 MTase, as well as the other three homologs (i.e., CM15mP30\_3110, CM15mP57\_4380, and CM15mP70\_4410), likely possess GAWTC specificity as a canonical motif and exhibit off-target GANTC methylation under non-optimal conditions such as high enzymatic and glycerol concentrations.

## Note S2. *In vivo* assay of MTases that possess GADTC specificity

Based on the metaepigenomic analysis, a methylated motif GADTC was detected with a high modification ratio (75.4–81.6%) from four Alphaproteobacteria P-MAGs (i.e., CM1\_5m.P124, CM1\_5m.P118, CM1\_5m.P20, and CM1\_5m.P56) (Data S3). However, modification ratio analysis showed not absent but weak GACTC methylation (29.6–35.4%) on the P-MAGs (Figure S6), suggesting that the responsible MTase did not strictly recognize GADTC modification rather than still possess a weak affinity for GACTC. Among the P-MAGs, one MTase gene that showed the highest sequence similarity to those with GANTC specificity was found in CM1\_5m.P20. Thus, as described above, we hypothesized that CM15mP20\_30 MTase possesses novel GADTC specificity with weak GACTC affinity.

The REase digestion assay of MTase showed that TfiI cleavage was almost completely inhibited at all temperatures tested, indicating that MTase possesses GAWTC specificity (Figure S7e). In contrast, the HinfI cleavage showed extra upper bands at 5 °C, which were not observed in other MTases with GAWTC specificity under the same conditions (Figures S7a–d), and complete inhibition at >10 °C, similar to the MTase with GANTC specificity (Figure S7f). However, this profile was consistent with the hypothesized GADTC specificity: GAGTC hemimethylation (where GAGTC is methylated while complementary GACTC is not methylated) is sufficient for blocking HinfI cleavage (12). Indeed, re-sequencing analysis of *E. coli* in which the MTase gene was transferred successfully recalled GADTC methylated motifs from the cells incubated at 5 °C, whereas GANTC was detected in the cells incubated at 15 °C (Table S4). Taken together, although the molecular mechanism is still unclear, these results suggest that CM15mP20\_30 MTase recognizes GADTC as canonical and possesses weak GACTC specificity, which may be affected by external conditions such as temperature.

## Supplementary references

1. J. R. Horton, C. B. Woodcock, S. B. Opot, N. O. Reich, X. Zhang, X. Cheng, The cell cycle-regulated DNA adenine methyltransferase CcrM opens a bubble at its DNA recognition site. *Nat. Commun.* **10**, 4600 (2019).
2. R. F. Albu, T. P. Jurkowski, A. Jeltsch, The *Caulobacter crescentus* DNA-(adenine-N6)-methyltransferase CcrM methylates DNA in a distributive manner. *Nucleic Acids Res.* **40**, 1708–1716 (2012).
3. O. Kontinen, J. Carmody, S. Pathuri, K. Anderson, X. Zhou, N. Reich, Cell cycle regulated DNA methyltransferase: Fluorescent tracking of a DNA strand-separation mechanism and identification of the responsible protein motif. *Nucleic Acids Res.* **48**, 11589–11601 (2020).
4. C. B. Woodcock, A. B. Yakubov, N. O. Reich, *Caulobacter crescentus* cell cycle-regulated DNA methyltransferase uses a novel mechanism for substrate recognition. *Biochemistry.* **56**, 3913–3922 (2017).
5. J. G. Borgaro, N. Benner, Z. Zhu, Fidelity index determination of DNA methyltransferases. *PLoS One.* **8**, e63866 (2013).
6. H. M. Cohen, D. S. Tawfik, A. D. Griffiths, Promiscuous methylation of non-canonical DNA sites by HaeIII methyltransferase. *Nucleic Acids Res.* **30**, 3880–3885 (2002).
7. B. Bandaru, J. Gopal, A. S. Bhagwat, Overproduction of DNA cytosine methyltransferases causes methylation and C → T mutations at non-canonical sites. *J. Biol. Chem.* **271**, 7851–7859 (1996).
8. J. D. Taylor, A. J. Goodall, C. L. Vermote, S. E. Halford, Fidelity of DNA recognition by the EcoRV restriction/modification system in vivo. *Biochemistry.* **29**, 10727–10733 (1990).
9. C. P. J. Woodbury, R. L. Downey, P. H. von Hippel, DNA site recognition and overmethylation by the Eco RI methylase. *J. Biol. Chem.* **255**, 11526–11533 (1980).
10. T. Friedrich, M. Fatemi, H. Gowhar, O. Leismann, A. Jeltsch, Specificity of DNA binding and methylation by the M.FokI DNA methyltransferase. *Biochim. Biophys. Acta - Protein Struct. Mol. Enzymol.* **1480**, 145–159 (2000).

- 94 11. C. Beck, S. Cranz, M. Solmaz, M. Roth, A. Jeltsch, How does a DNA interacting enzyme change its specificity during  
95 molecular evolution? A site-directed mutagenesis study at the DNA binding site of the DNA-(adenine-N6)-  
96 methyltransferase EcoRV. *Biochemistry*. **40**, 10956–10965 (2001).
- 97 12. M. Nelson, C. Christ, I. Schildkraut, Alteration of apparent restriction endonuclease recognition specificities by DNA  
98 methylases. *Nucleic Acids Res.* **12**, 5165–5173 (1984).

99

100

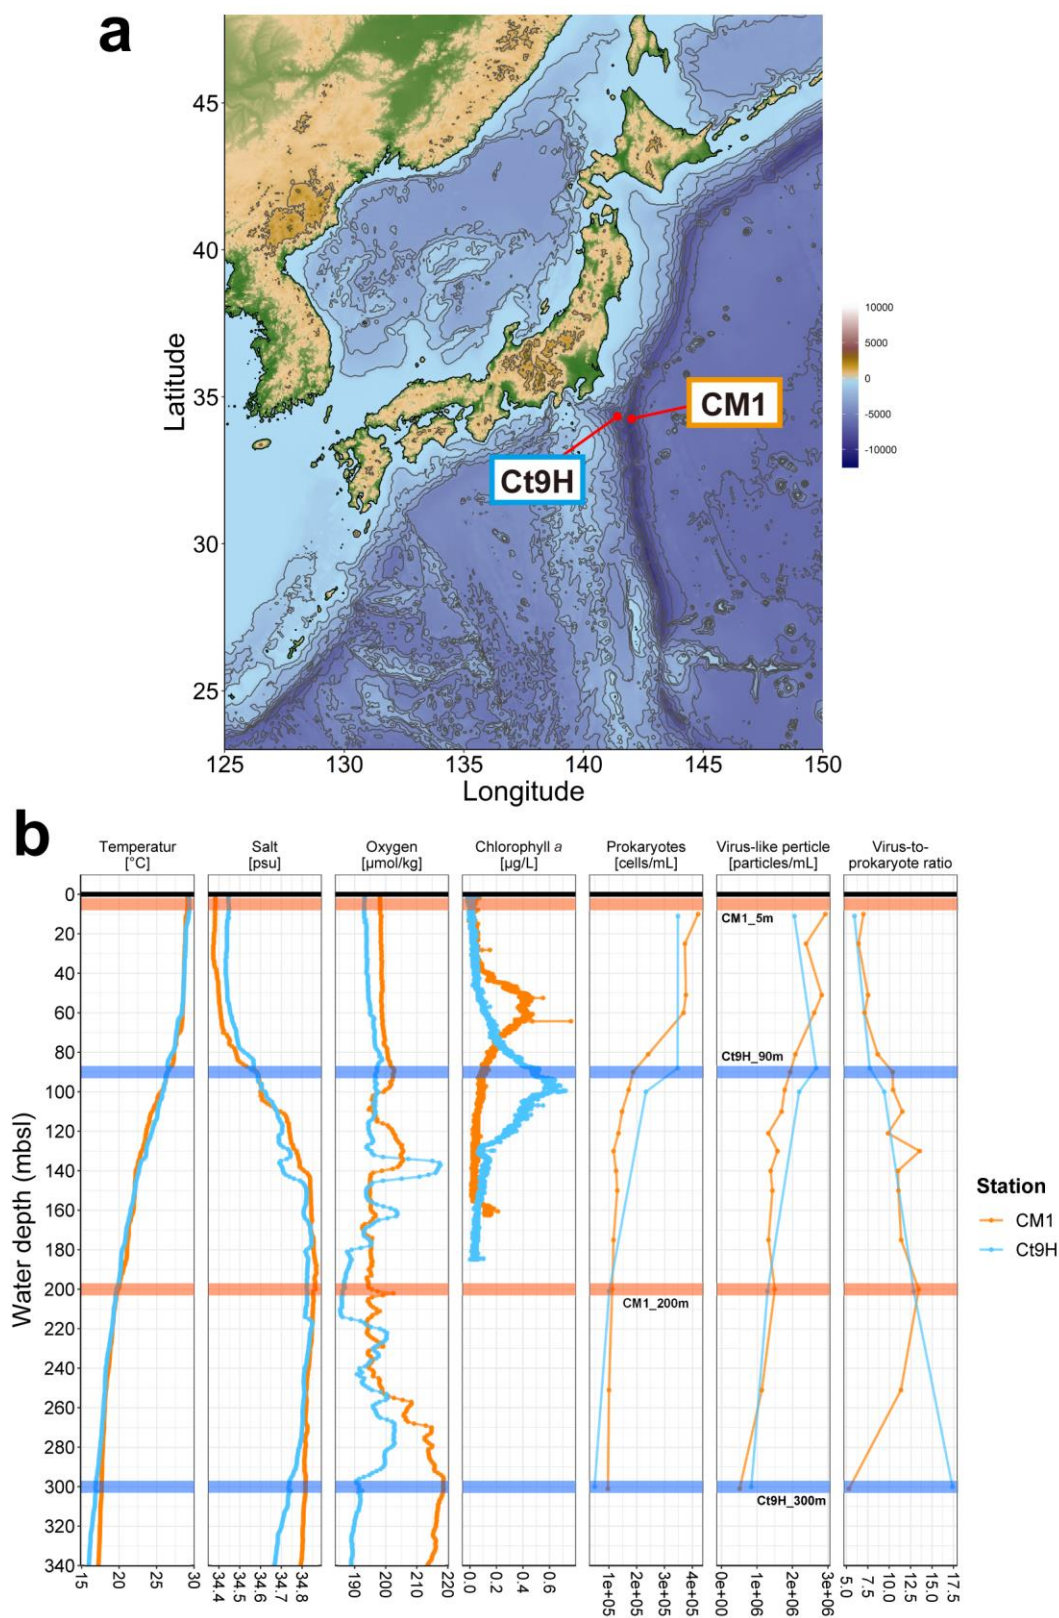

102

103

104

105

106

107

**Figure S1.** Hydrographic characteristics of the sampling sites. **a** Map of the Japanese archipelago. The red points indicate the sampling sites. **b** Vertical profiles of chemical concentrations and abundances of prokaryotic cells and virus-like particles. Profiles of water temperature, salinity concentration, dissolved oxygen concentration, and chlorophyll *a* concentration were measured *in situ*. Orange and blue represent CM1 and Ct9H sampling sites, respectively. The horizontal lines represent depths where the seawater samplings were conducted; 5 and 200 mbsl at CM1 site, and 90 and 300 mbsl at Ct9H site.

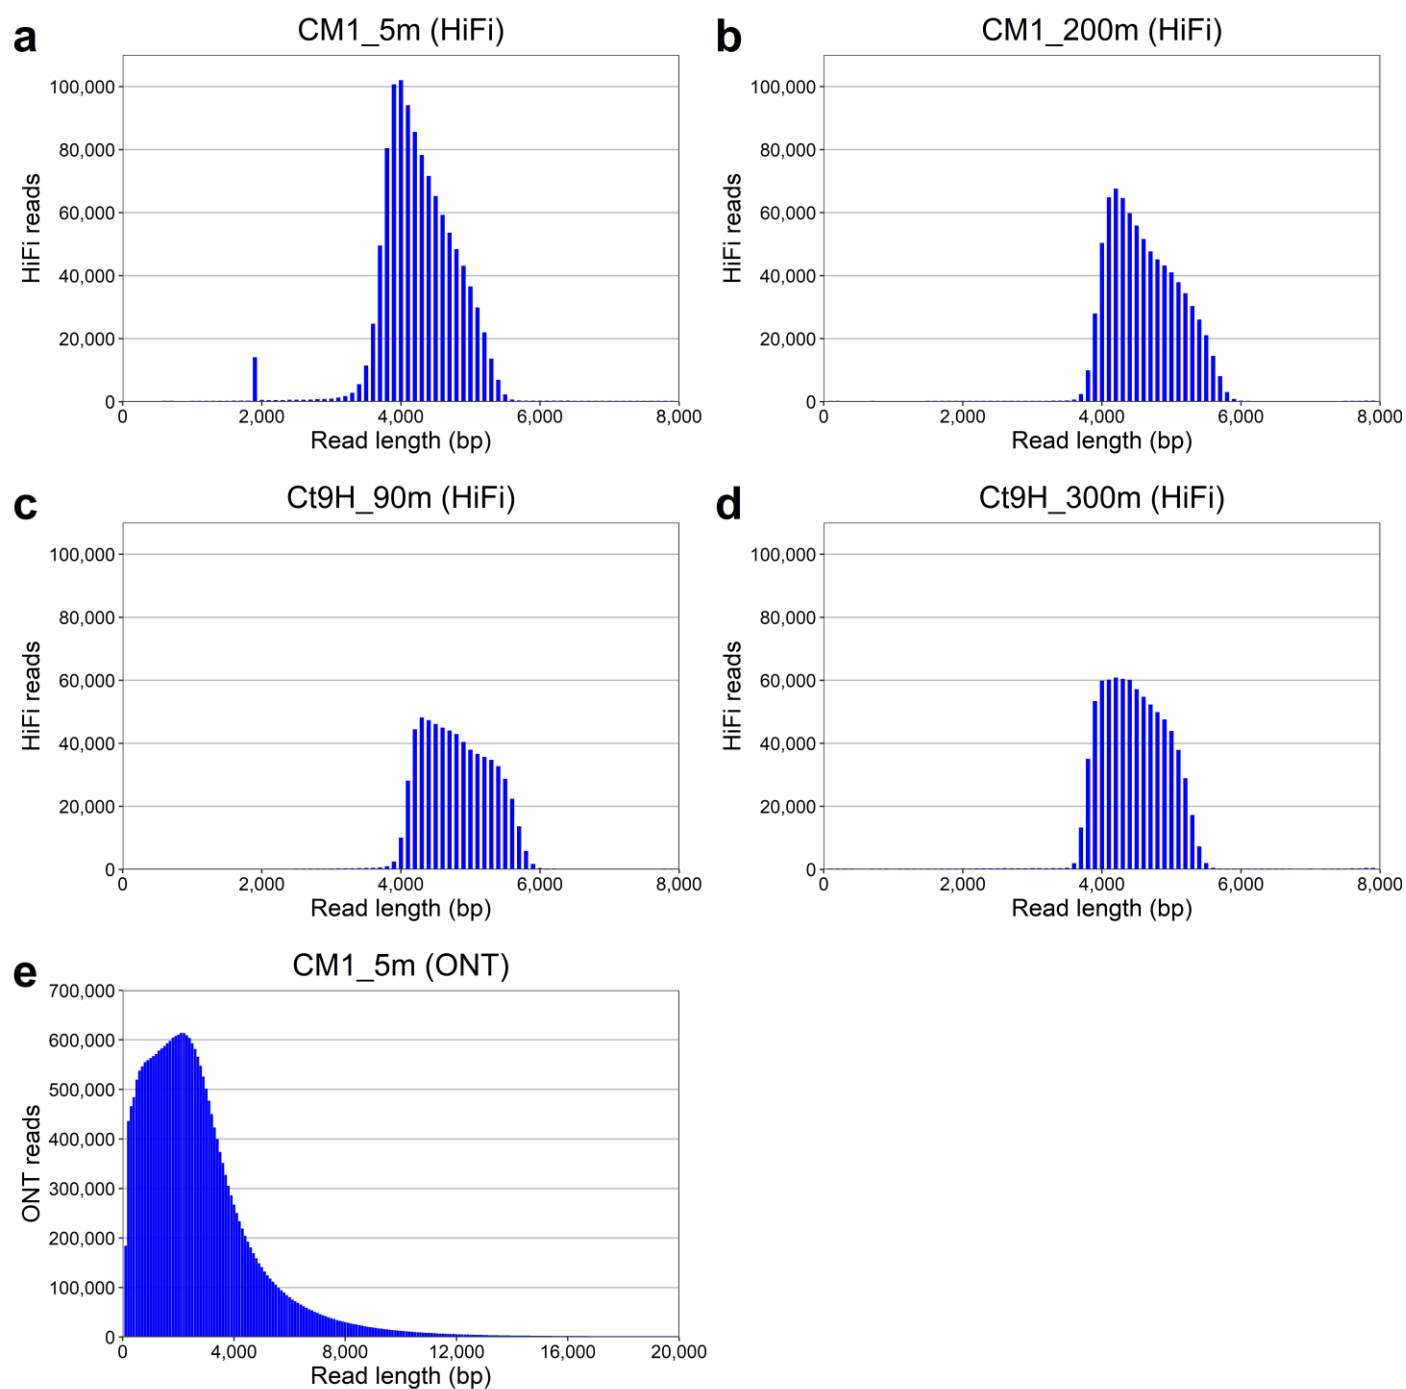

109

**Figure S2.** Frequency distribution of the length of sequencing reads. Read lengths were binned in 100-bp increments. **a–d** HiFi reads from PacBio Sequel. The SMRT libraries were size-selected at a 5-kb length. **a** We noted a small peak at 2 kb in CM1\_5m, which likely reflected SMRT bell templates that unexpectedly collapsed either of the terminal hairpin adapters, although this may not significantly affect further sequencing reads and modification analyses. **e** ONT reads from Oxford Nanopore GridION. Reads ranging from 0–20 kb in length are presented. ONT libraries with short DNA fragment sizes were filtered out through the AMPure purification process in advance of the sequencing.

116

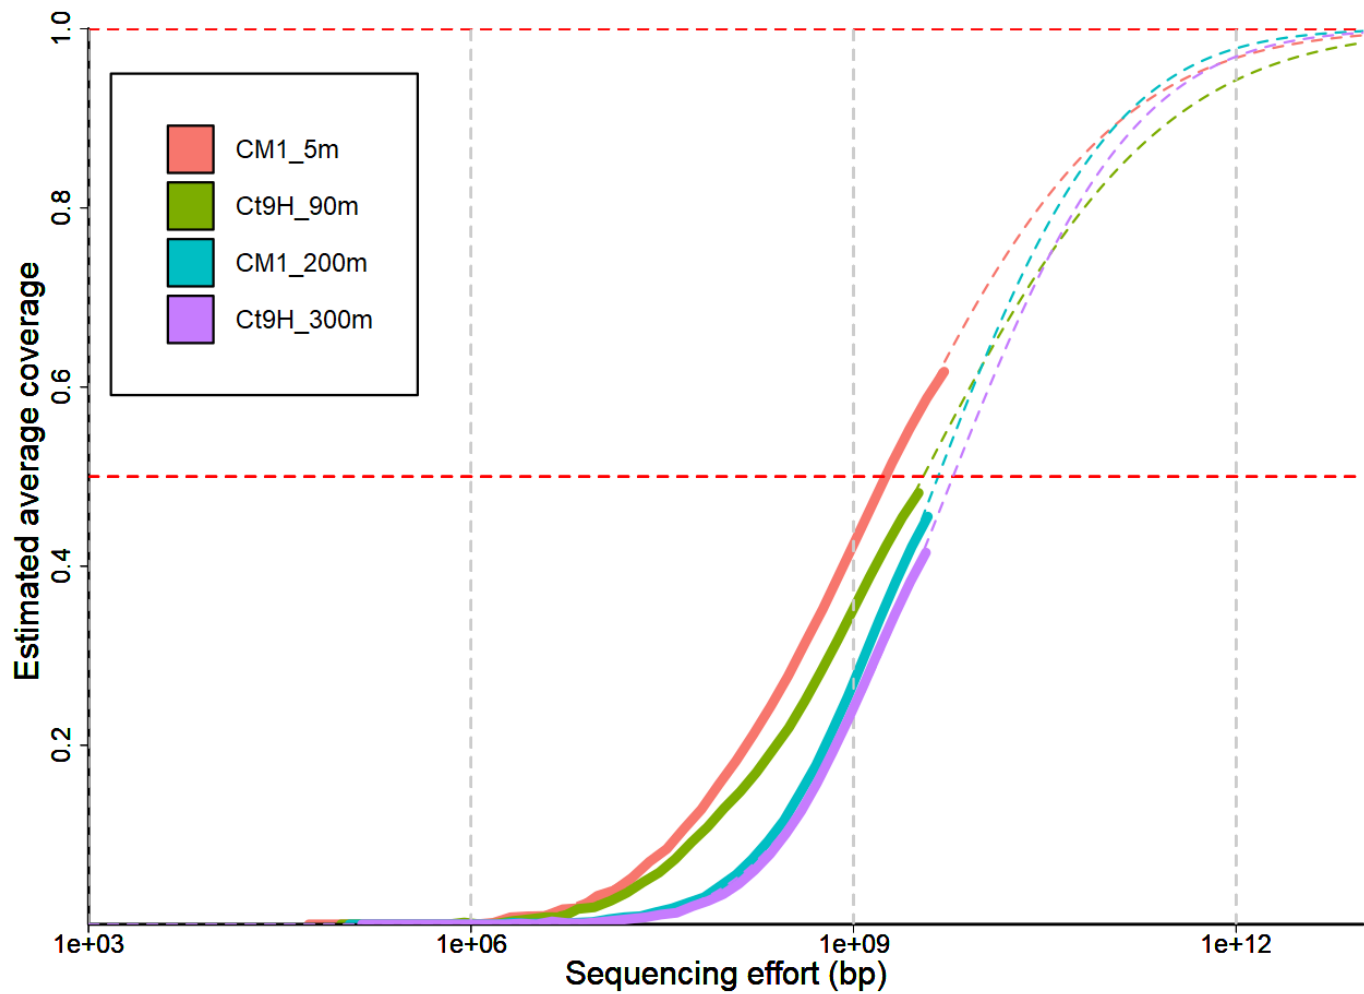

117  
 118  
 119  
 120  
 121

**Figure S3.** Estimated metagenomic coverage of HiFi reads. The dashed curves indicate the fitted models of the Nonpareil curves. The red horizontal dashed lines indicate 50% and 100% coverage.

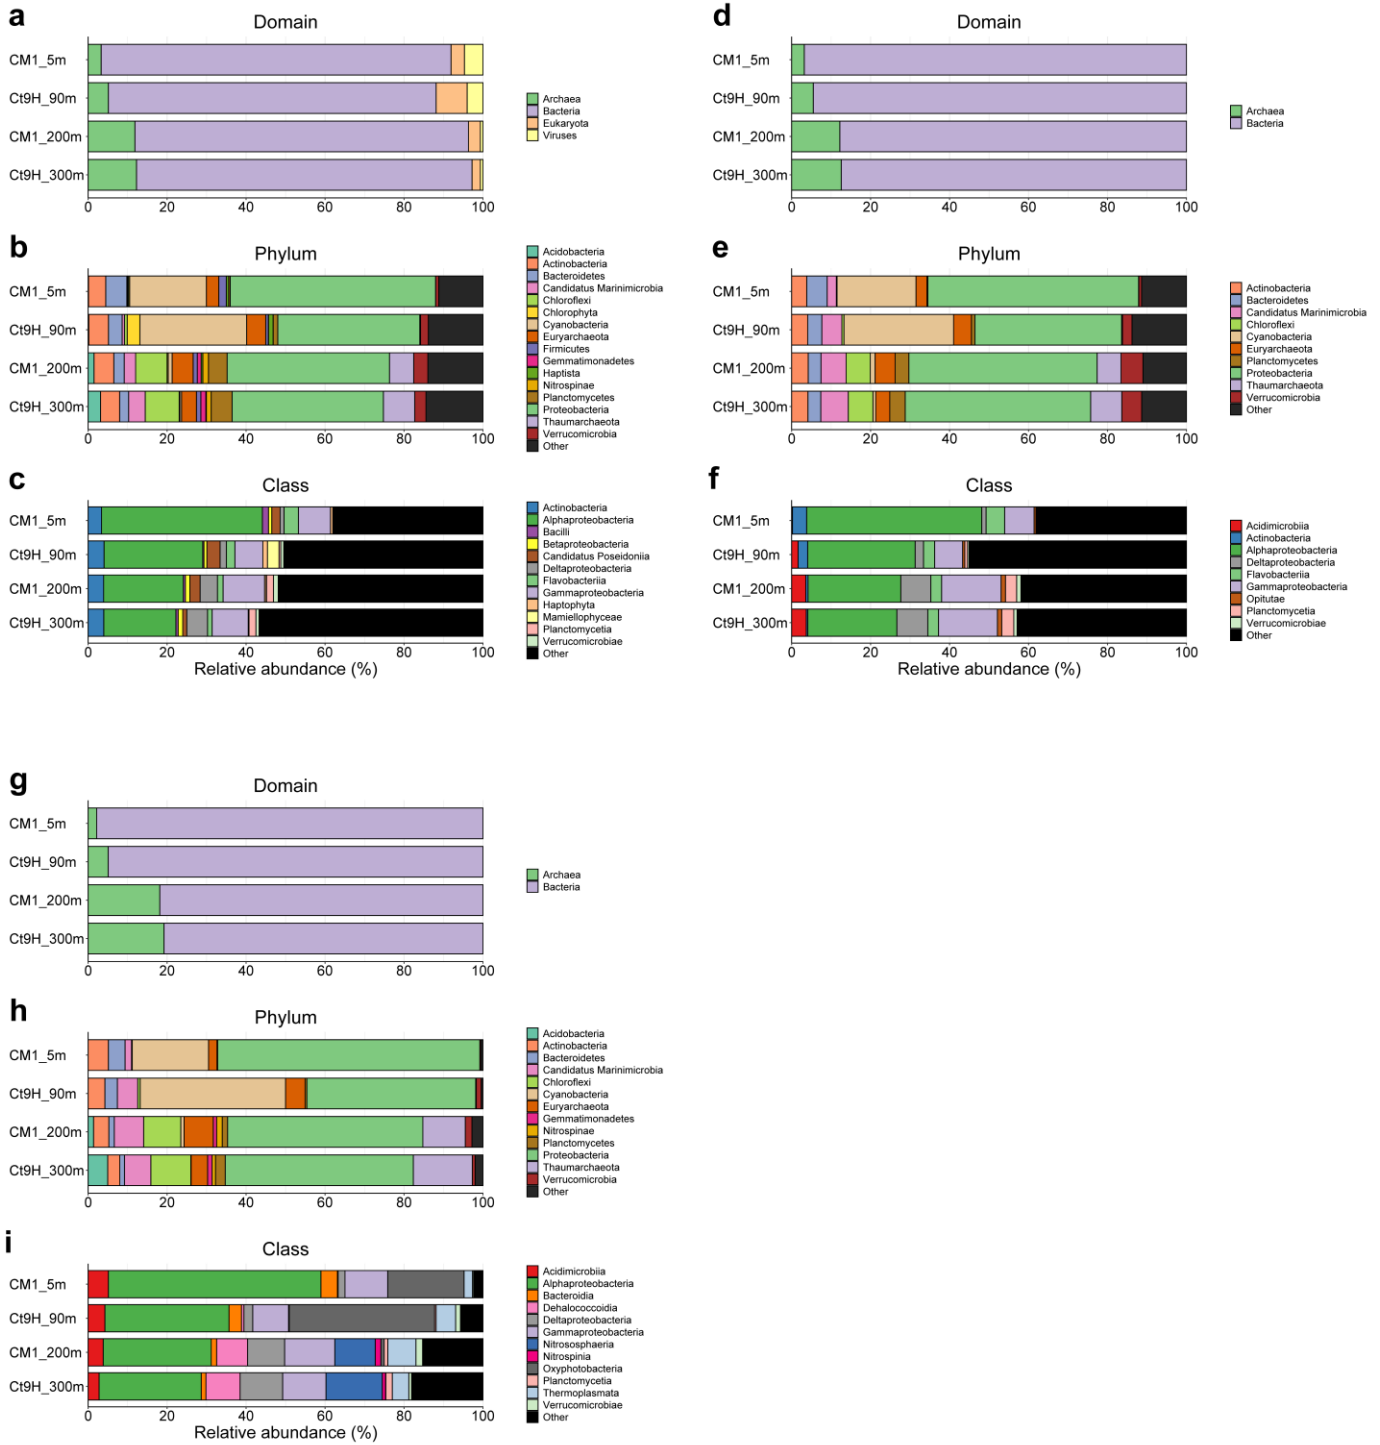

**Figure S4.** Taxonomic profiles of HiFi reads. Estimated relative abundances obtained using Kaiju with the NCBI nr database at the **a** domain, **b** phylum, and **c** class levels, those with the GORG database at the **d** domain, **e** phylum, and **f** class levels, and those from BLASTN analysis of full-length 16S rRNA gene sequences with the SILVA database at the **g** domain, **h** phylum, and **i** class levels are presented. The eukaryotic and viral reads are ignored in **d-i** based on the databases used. Sequences assigned to members with <1% abundance or taxonomically unclassified are grouped as ‘Others.’



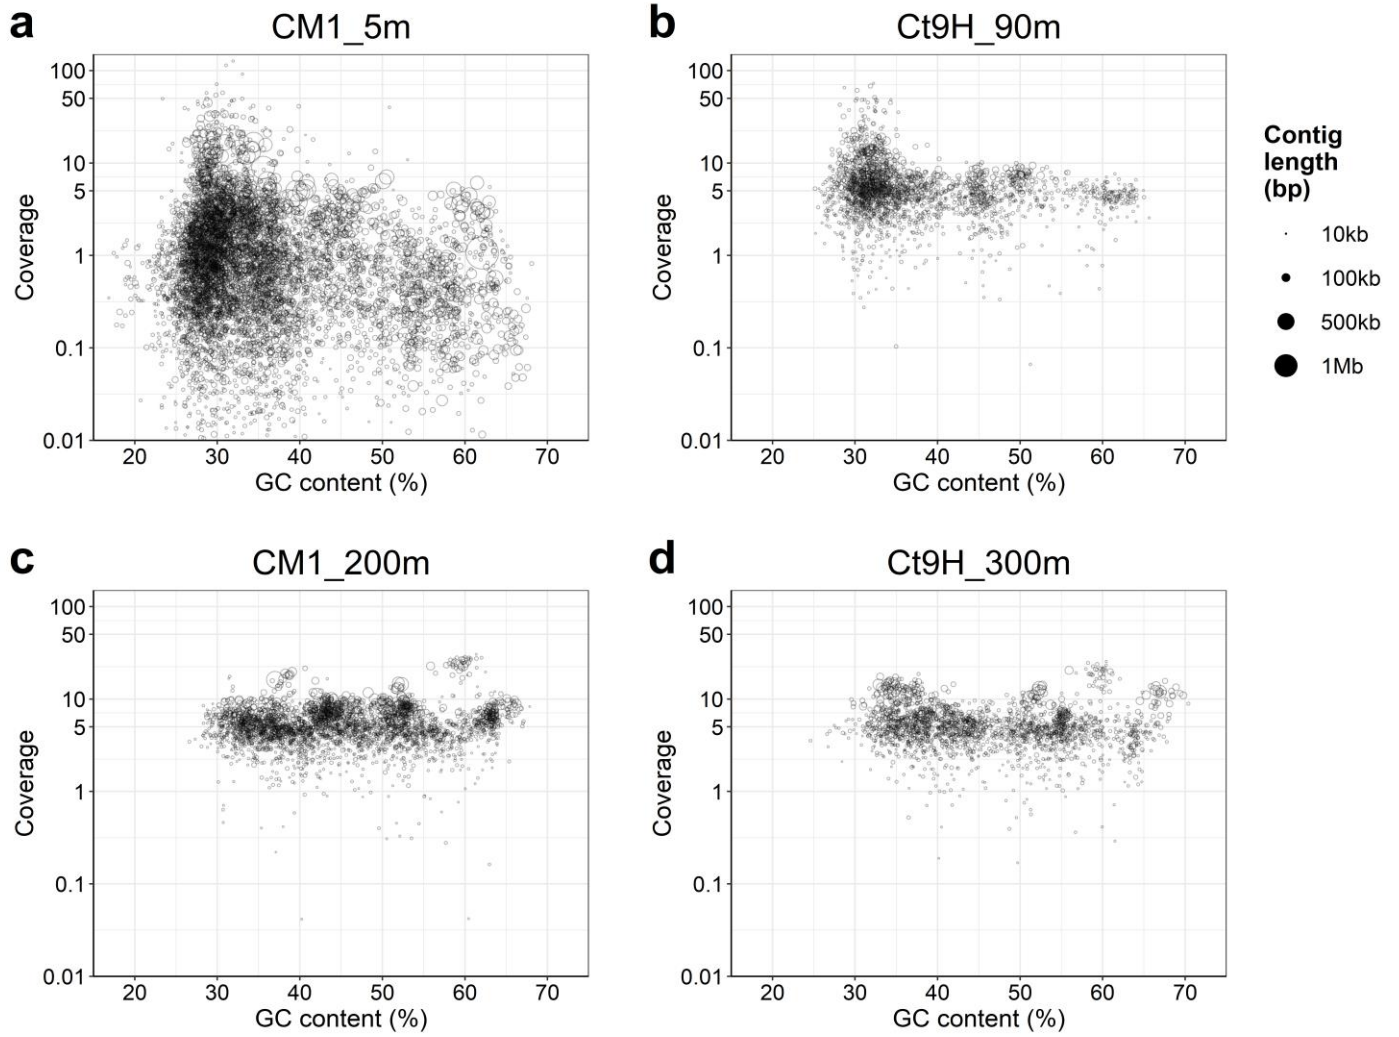

129

130 **Figure S5.** Assembled contigs. **a** CM1\_5m assembled from ONT reads after polishing. Contigs with  $> 0.01\times$  coverage against  
 131 HiFi reads are presented. **b** Ct9H\_90m assembled from HiFi reads. **c** CM1\_200m assembled from HiFi reads. **d** Ct9H\_300m  
 132 sample assembled from HiFi reads. Each circle represents a contig, where the size represents its total sequence length. The x-  
 133 and y-axes represent GC content and genome coverage of HiFi reads, respectively.

134

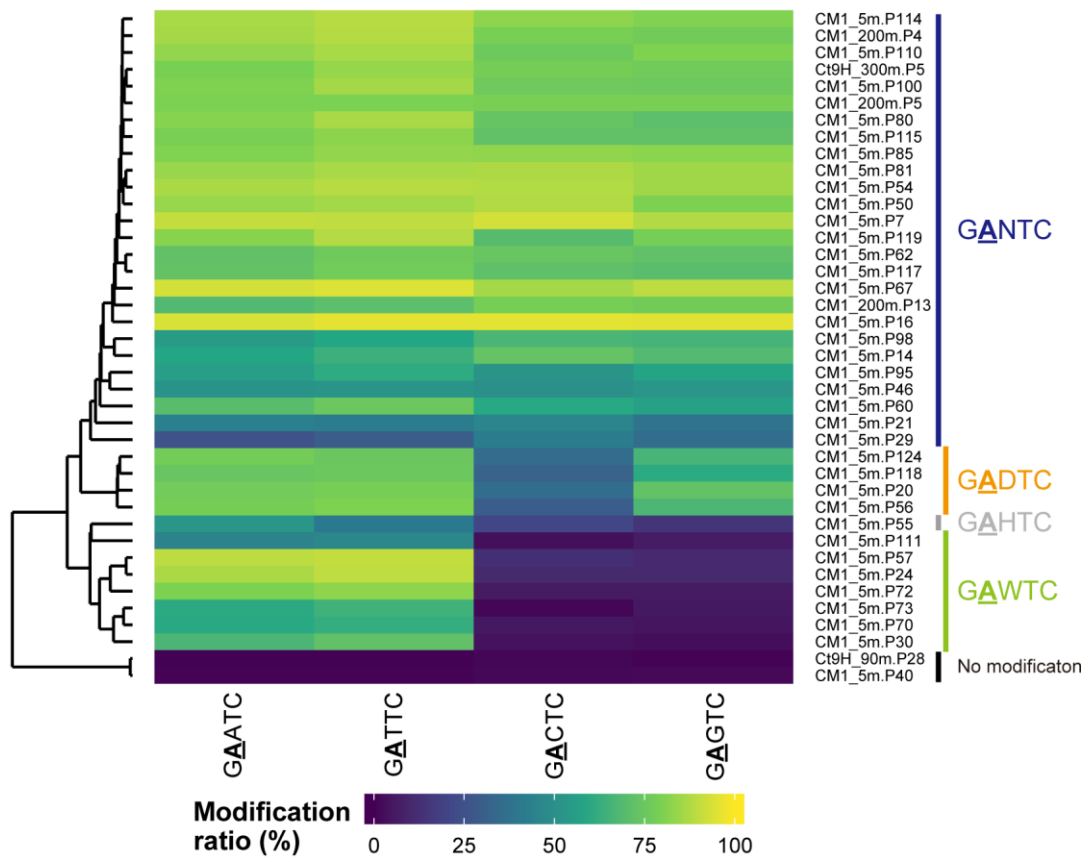

135

136

137

138

139

140

141

**Figure S6.** Methylomes of Alphaproteobacteria P-MAGs. The components of GANTC are presented. The left dendrogram represents a hierarchical clustering of the modification ratios on each P-MAG. The distance matrix was calculated based on the Euclidean distance, and the clusters were calculated using the single-linkage method. Methylated motifs detected in each P-MAG using the metaepigenomic analysis are indicated on the right side. We noted that the GAHTC from CM1\_5m.P55 was supported by low subread coverage (36×) and may be a misdetection.

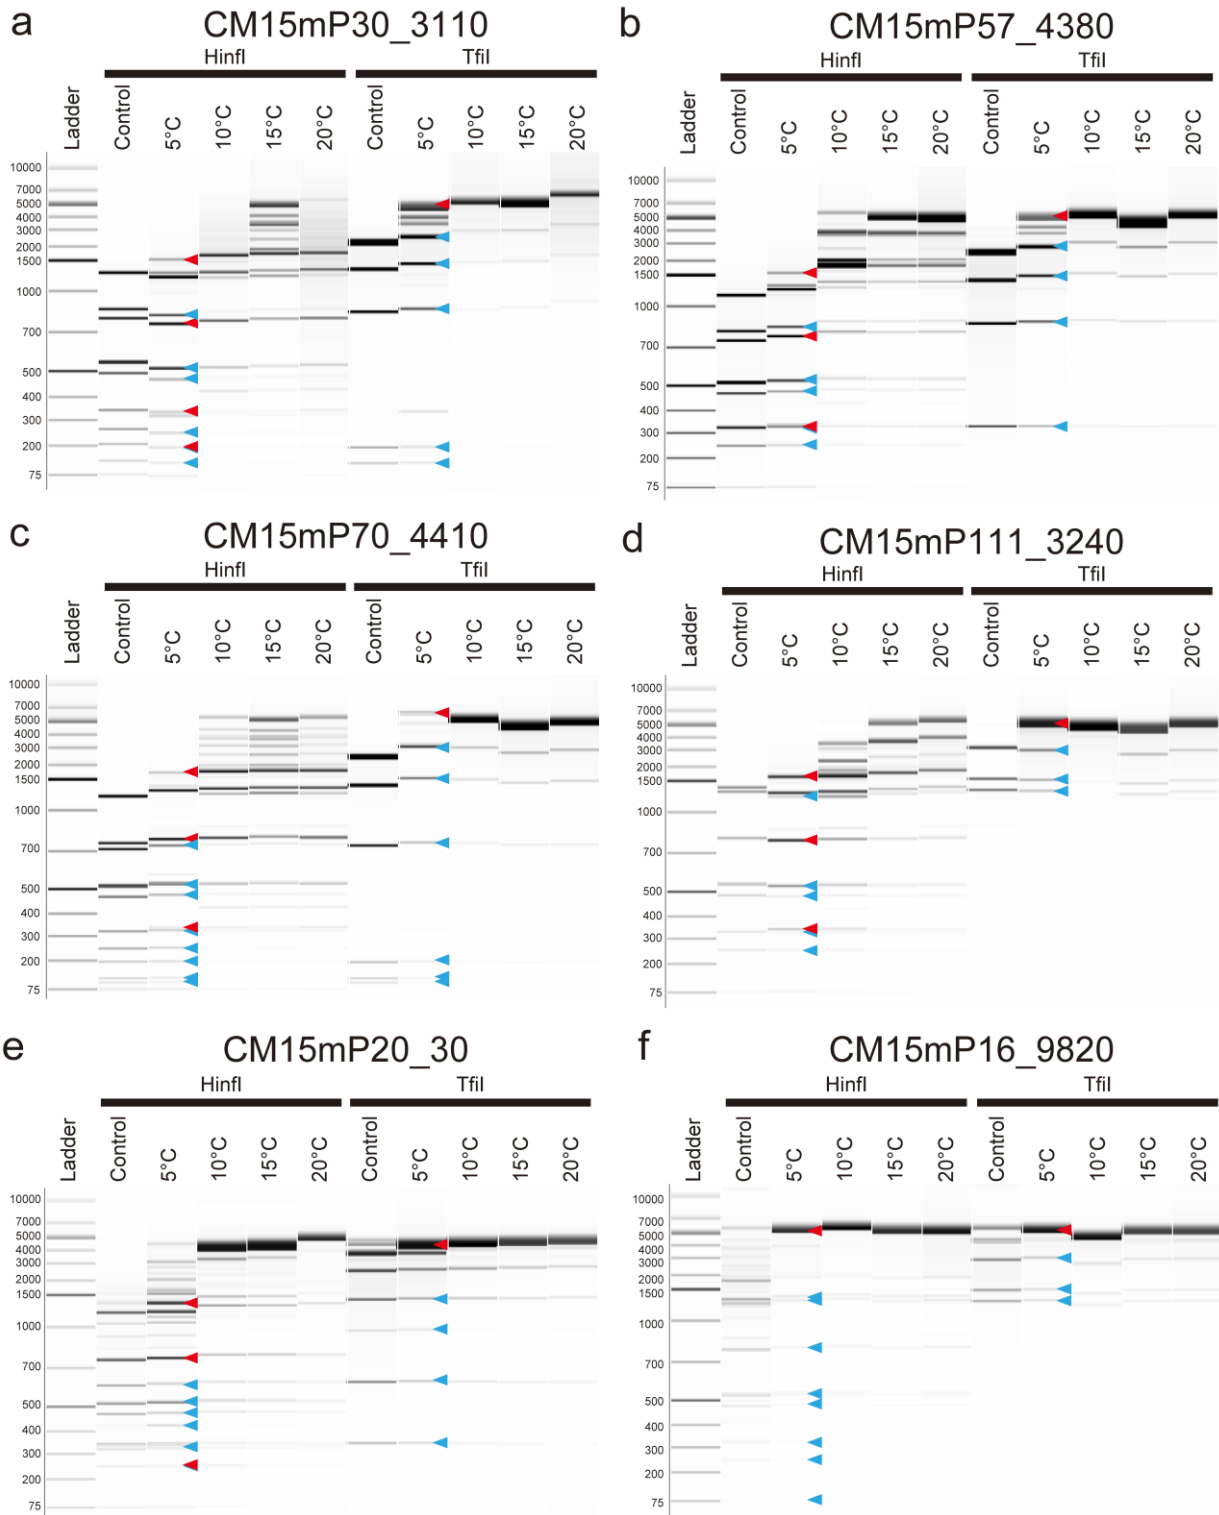

142

143

144

145

146

147

148

149

150

**Figure S7.** REase digestion assays of MTases that were detected in Alphaproteobacteria P-MAGs. *Hin*I (GANCT) and *Tfi*I (GAWTC) REases were employed for the assays, where the plasmids contained 10–14 GANTC and 3–6 GAWTC target sites. All plasmid DNAs were linearized using *Nde*I. Based on the metaepigenomic analysis, **a–d** GAWTC, **e** GADTC, and **f** GANTC were hypothesized motifs of each MTase. Band sizes that theoretically appeared or were depleted when the hypothesized methylation occurred are indicated by red and blue triangle marks, respectively. We noted that several unexpected bands appeared in the upper side of the control samples of each *Hin*I and *Tfi*I cleavage assays in **e** and **f**, possibly due to the leakage expressions from the constructs.

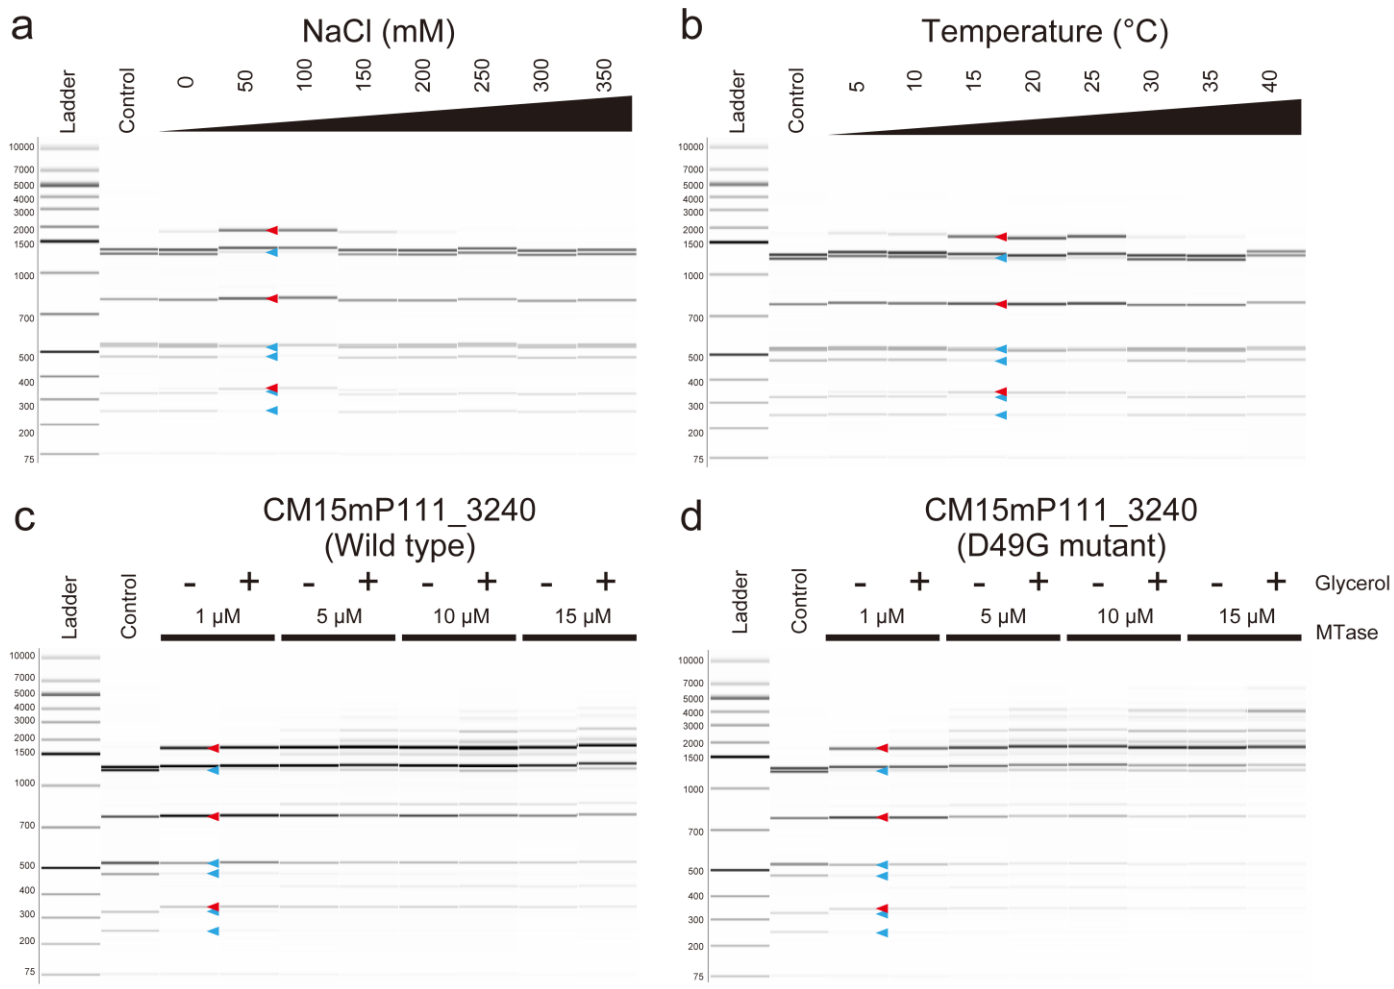

**Figure S8.** *In vitro* REase digestion assays of purified CM15mP111\_3240 MTase and its mutant. Sensitivity assays of **a** salt and **b** temperature of the original MTase and assays of high enzymatic and glycerol concentrations in the **c** MTase and **d** D49G mutant are presented. Glycerol concentrations were changed to 0% (-) and 10% (+) (v/v). HinfI (GANCT specificity) was employed for the assays, where the substrate DNAs contained 10 GANTC target sites. Unmethylated substrate DNAs were produced using PCR. Band sizes that were expected to appear (red) and disappear (blue) when GAWTC methylation occurs are indicated with triangle marks. Substrate DNAs without MTase reaction were used for the control.





**Figure S10.** Phylogenetic diversity of the Observed/Expressed (O/E) ratio of GANTC sequence. Pairs of a phylogenetic tree and O/E ratios of **ab** Alphaproteobacteria and **cd** SAR11 are presented. **a** Four Betaproteobacteria and four Gammaproteobacterial genomes were used as outgroups. Taxonomic groups at the order level are indicated in brown. We noted Magnetococcia (comprised of *Magnetococcus* and *Magnetofaba*) is currently classified as Alphaproteobacteria but was recently proposed to establish a novel Magnetococcia class. **c** The P-MAGs obtained in this study are colored in light green. One *Acidiphillum*, one *Rhodospirillum*, and two *Rickettsia* genomes were used as outgroups. Subclades are indicated in brown, and the inferred minor subgroups in subclade V referred to in this study are indicated with blue bars and texts. All the genomes retrieved from the NCBI repository are summarized in Supplementary Data S5.

## Supplementary tables

**Table S1.** Descriptions of sampling sites

| Sample    | Cruise ID | Sampling method | Collection date | Area                 | Description | Sation | Location             | Environmental feature | Elevation (mbsl) | Sample amount (L) |
|-----------|-----------|-----------------|-----------------|----------------------|-------------|--------|----------------------|-----------------------|------------------|-------------------|
| CM1_5m    | KM19-07   | Intake pipe     | 2019-09-02      | Izu-Ogasawara Trench | CM1         | 34N11  | 34.2607 N 142.0203 E | Epipelagic zone       | 5                | 200               |
| CM1_200m  | KM19-07   | Niskin sampler  | 2019-09-02      | Izu-Ogasawara Trench | CM1         | 34N11  | 34.2607 N 142.0203 E | Mesopelagic zone      | 200              | 180               |
| Ct9H_90m  | KM19-07   | Niskin sampler  | 2019-09-06      | Izu-Ogasawara Trench | Ct9H        | 34N12  | 34.3317 N 141.4143 E | Epipelagic zone       | 90               | 50                |
| Ct9H_300m | KM19-07   | Niskin sampler  | 2019-09-06      | Izu-Ogasawara Trench | Ct9H        | 34N12  | 34.3317 N 141.4143 E | Mesopelagic zone      | 300              | 320               |

**Table S2.** Data on metagenomic shotgun sequencing read and HiFi read analyses

|                         | Sample              | CM1_5m          | Ct9H_90m       | CM1_200m       | Ct9H_300m      |
|-------------------------|---------------------|-----------------|----------------|----------------|----------------|
| PacBio Sequel           | Subread reads       | 20,889,048      | 15,827,638     | 18,959,396     | 19,589,319     |
|                         | ---Read length (bp) | 5,001 ± 2,522   | 4,716 ± 1,963  | 4,519 ± 1,749  | 4,381 ± 1,708  |
|                         | ---Total base (bp)  | 104,456,419,820 | 74,635,717,619 | 85,686,708,868 | 85,823,726,072 |
|                         | HiFi reads          | 1,106,089       | 657,109        | 812,032        | 809,717        |
|                         | ---Read length (bp) | 4,311 ± 540     | 4,926 ± 771    | 4,707 ± 664    | 4,559 ± 630    |
|                         | ---Total base (bp)  | 4,768,807,324   | 3,237,145,123  | 3,821,978,925  | 3,691,721,393  |
|                         | ---16S rRNA         | 1,773           | 1,296          | 1,543          | 1,408          |
|                         | ---CDSs             | 7,514,379       | 5,109,850      | 5,585,360      | 5,369,598      |
|                         | --- ---MTase        | 27,676          | 8,067          | 12,846         | 3,324          |
| Oxford Nanopore GridION | Sequenced reads     | 24,562,005      | -              | -              | -              |
|                         | ---Read length (bp) | 2,734 ± 2,013   | -              | -              | -              |
|                         | ---Total base (bp)  | 67,142,060,909  | -              | -              | -              |
| Illumina MiSeq          | Paired-end reads    | 9,433,870       | 8,637,416      | 10,330,676     | 9,015,972      |
|                         | ---Read length (bp) | 288 ± 31        | 286 ± 34       | 283 ± 34       | 284 ± 34       |
|                         | ---Total base (bp)  | 2,720,391,360   | 2,472,592,381  | 2,919,215,542  | 2,558,126,139  |



**Table S3.** Data on metagenomic assembly and genome binning

| Sample    | Contigs | Total length (bp) | N50 (bp) | Longest length (bp) | Average length (bp) | P-MAGs | Mapped HiFi reads on P-MAGs (%) | V-MAGs | Mapped HiFi reads on V-MAGs (%) |
|-----------|---------|-------------------|----------|---------------------|---------------------|--------|---------------------------------|--------|---------------------------------|
| CM1_5m    | 29,391  | 524,431,517       | 29,344   | 2,239,202           | 17,843              | 130    | 31.5                            | 159    | 4.72                            |
| Ct9H_90m  | 7,829   | 82,604,737        | 11,600   | 307,709             | 10,551              | 30     | 9.4                             | 3      | 0.19                            |
| CM1_200m  | 10,824  | 123,124,031       | 12,650   | 545,541             | 11,375              | 41     | 24.7                            | 1      | 0.01                            |
| Ct9H_300m | 8,145   | 82,769,163        | 10,530   | 362,843             | 10,162              | 32     | 19.9                            | 0      | NA                              |

**Table S4.** Methylated motifs detected in the chromosomal DNA of *E. coli* transformed with artificially-synthesized MTase genes

| Genome ID     | Transformed MTase gene ID | Detected methylated motif | Modification Type | Number of methylated sites | Number of motif sequences | Methylation ratio (%) | Mean modification QV | Mean subread coverage | Description       |
|---------------|---------------------------|---------------------------|-------------------|----------------------------|---------------------------|-----------------------|----------------------|-----------------------|-------------------|
| Ct9H_300m.P26 | Ct9H300mP26_1870          | BAAAA <u>A</u>            | m6A               | 45818                      | 47616                     | 96.2%                 | 453.2                | 672.4                 |                   |
| Ct9H_90m.P5   | Ct9H90mP5_10800           | BAAAA <u>A</u>            | m6A               | 4375                       | 47616                     | 9.2%                  | 550.6                | 666.5                 |                   |
| CM1_200m.P2   | CM1200mP2_32760           | CAA <u>A</u> T            | m6A               | 9630                       | 9958                      | 96.7%                 | 564.7                | 668.7                 |                   |
| CM1_5m.P129   | CM15mP129_7780            | ACAAA <u>A</u>            | m6A               | 10950                      | 11372                     | 96.3%                 | 459.4                | 675.0                 |                   |
| CM1_200m.P10  | CM1200mP10_13750          | <u>C</u> TCC              | m4C               | 10992                      | 19137                     | 57.4%                 | 226.6                | 649.6                 |                   |
| CM1_5m.P20    | CM15mP20_30               | G <u>A</u> DTC            | m6A               | 15451                      | 17919                     | 86.2%                 | 416.8                | 679.0                 | Incubated at 5°C  |
| CM1_5m.P20    | CM15mP20_30               | G <u>A</u> NTC            | m6A               | 9839                       | 21484                     | 45.8%                 | 535.8                | 681.1                 | Incubated at 15°C |

R= A/G, Y= C/T, M= A/C, K= G/T, S= C/G, W= A/T, H= A/C/T, B= C/G/T, V= A/C/G, D= A/G/T, N= A/C/G/T
